# Supplementary material for: Normal and reverse base pairing of Iz and Oz lesions in DNA: structural implications for mutagenesis
Source: Royal Society of Chemistry journal article supplement (doi:10.1039/c6ra14031a), 2016-01-01
Supplement: c6ra14031a1.pdf [file c6ra14031a1.pdf]

## Supporting Information

### **Normal and Reverse Base Pairing of Iz and Oz Lesions in DNA: Structural Implications for Mutagenesis.**

<sup>1</sup>N.R. Jena\*, <sup>2</sup>P.C. Mishra

<sup>1</sup>Discipline of Natural Sciences, Indian Institute of Information Technology, Design and Manufacturing, Dumna Airport Road, Khamaria, Jabalpur-482005, India

<sup>2</sup>Department of Physics, Banaras Hindu University, Varanasi-221005, India

---

\*Corresponding Author's Email address: [nrjena@iiitdmj.ac.in](mailto:nrjena@iiitdmj.ac.in)

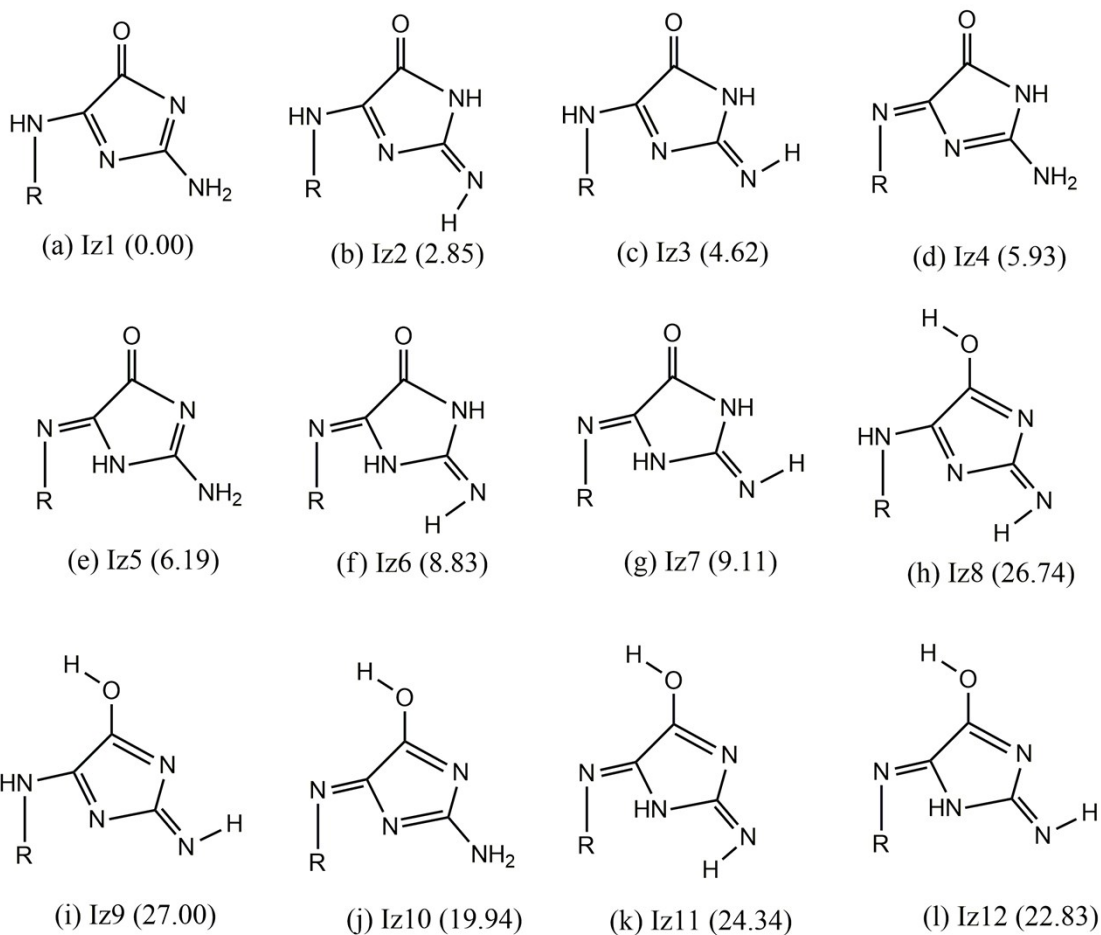

Fig. S1: Structures of different tautomers of Iz and their relative energies (kcal/mol) as obtained at the B3LYP/6-31+G\* method in aqueous medium. The tautomer presented in (a) is the most stable one. Here R stands for the deoxyribose group, which was replaced by the H9 atom during geometry optimizations.

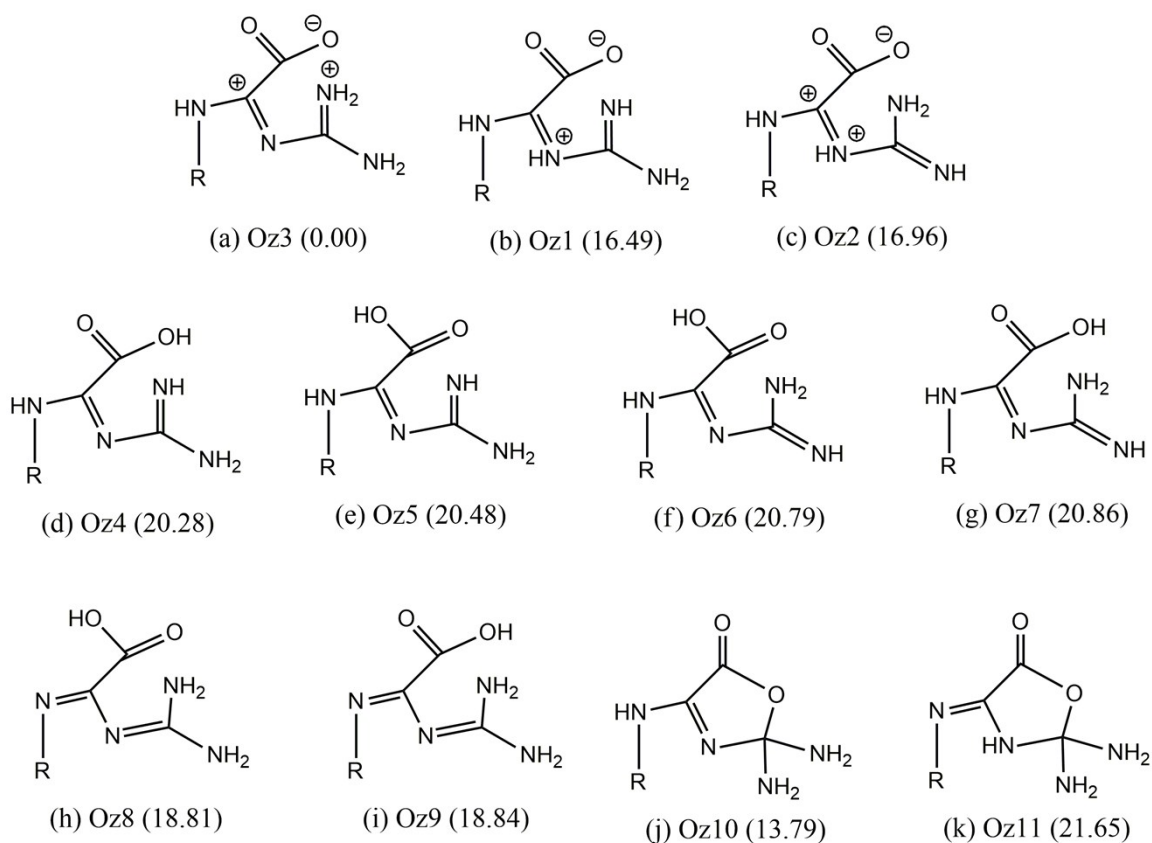

Fig. S2: Structures of different tautomers of Oz and their relative energies (kcal/mol) as obtained at the B3LYP/6-31+G\* method in aqueous medium. The tautomer presented in (a) is the most stable one. Here R stands for the deoxyribose group, which was replaced by the H9 atom during geometry optimizations.

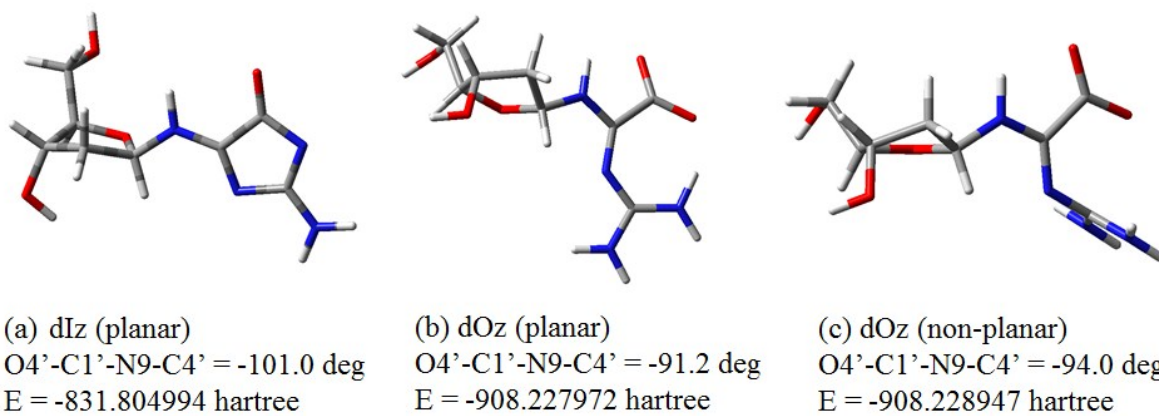

Fig.S3: Optimized structures of (a) planar 2'-deoxyimidazolone (dIz) and (b) planar and (c) non-planar 2'-deoxyoxazolone (dOz) obtained at the B3LYP/6-31+G\* level of theory. Important geometric parameters and total energies (hartree) are shown for comparison of structures and stabilities.

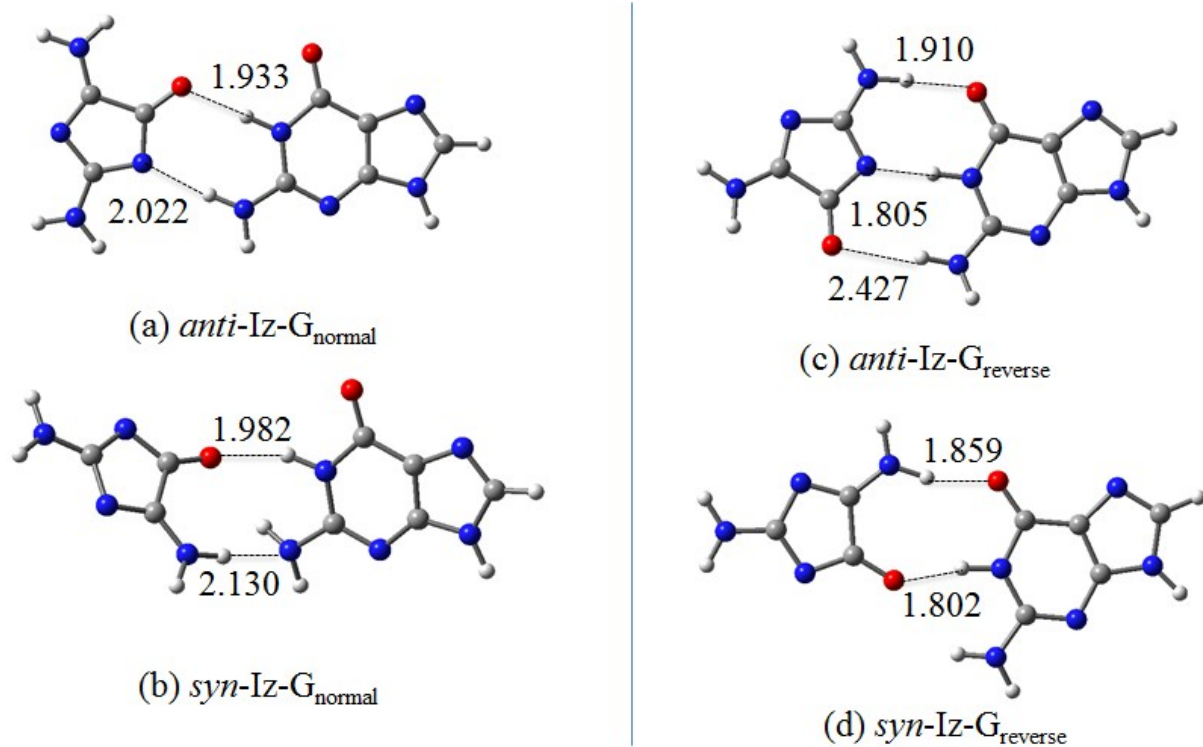

Fig. S4: Optimized structures of Iz:G complexes in the normal (a,b) and reverse (c,d) base pairing orientations obtained at the B3LYP/6-31+G\* level of theory.

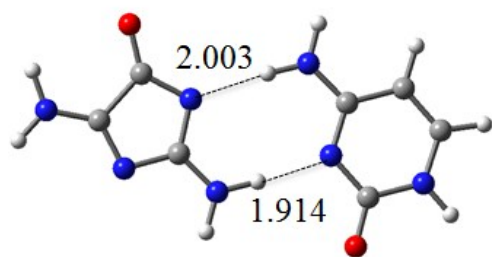

(a) *anti-Iz-C<sub>normal</sub>*

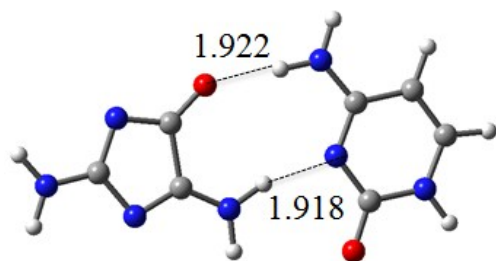

(b) *syn-Iz-C<sub>normal</sub>*

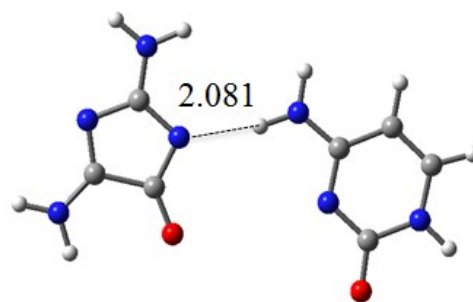

(c) *anti-Iz-C<sub>reverse</sub>*

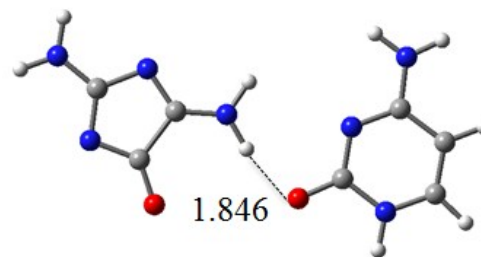

(d) *syn-Iz-C<sub>reverse</sub>*

Fig. S5: Optimized structures of Iz:C complexes in the normal (a,b) and reverse (c,d) base pairing orientations obtained at the B3LYP/6-31+G\* level of theory.

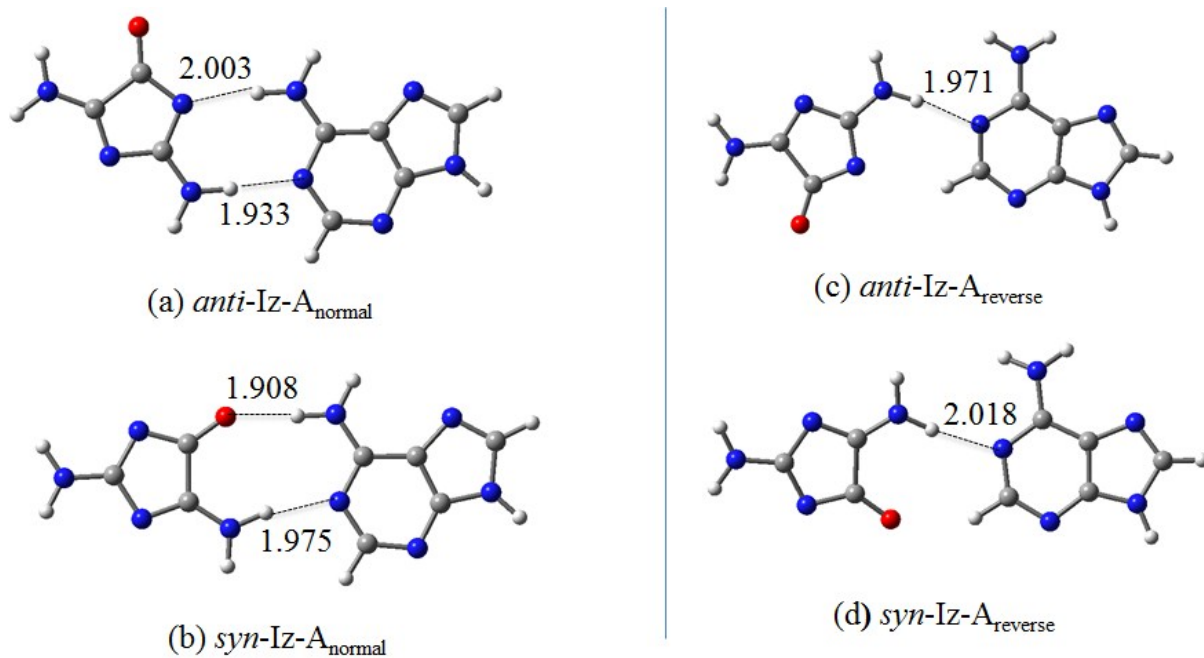

Fig. S6: Optimized structures of Iz:A complexes in the normal (a,b) and reverse (c,d) base pairing orientations obtained at the B3LYP/6-31+G\* level of theory.

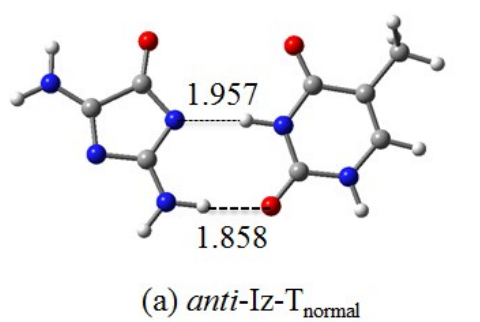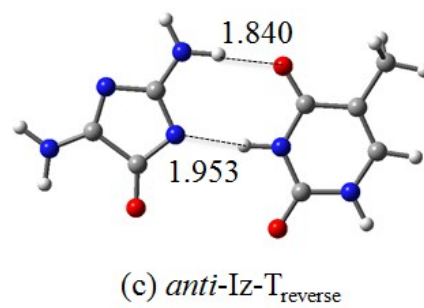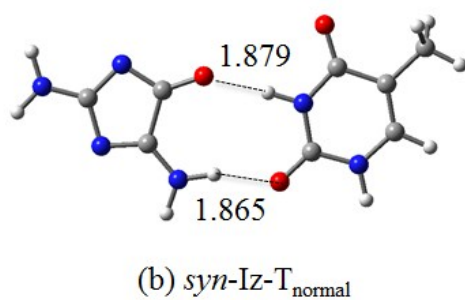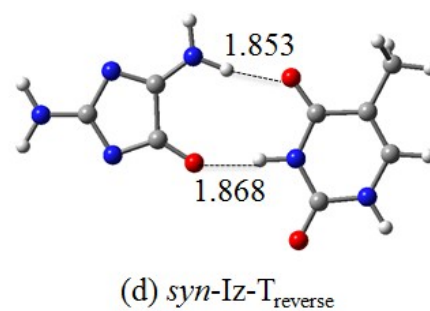

Fig. S7: Optimized structures of Iz:T complexes in the normal (a,b) and reverse (c,d) base pairing orientations obtained at the B3LYP/6-31+G\* level of theory.



Table S1: Zero-Point energy-corrected binding energies of different complexes involving Iz as obtained in aqueous medium. For comparison, zero-point energy-corrected binding energies of G:C and A:T complexes are shown in parentheses. Absent of entry indicates that the corresponding structure does not exist. Structures of these complexes are shown in Figs S1-S4.

| Base Pair                  | Method   | Normal base pairing |                | Reverse base pairing |                |
|----------------------------|----------|---------------------|----------------|----------------------|----------------|
|                            |          | <i>anti</i> -Iz     | <i>syn</i> -Iz | <i>anti</i> -Iz      | <i>syn</i> -Iz |
| Iz:G<br>(T:G) <sup>a</sup> | B3LYP    | -6.62 (-7.41)       | -4.09          | -9.74                | -7.94          |
|                            | ωB97XD   | -9.48 (-10.82)      | -6.96          | -14.10               | -10.79         |
|                            | B3LYP-D3 | -10.04 (-11.82)     |                | -15.23               |                |
| Iz:C<br>(G:C) <sup>a</sup> | B3LYP    | -7.37 (-11.63)      | -6.64          | -2.03                | -4.42          |
|                            | ωB97XD   | -10.77 (-16.26)     | -9.50          | -3.92                | -6.27          |
|                            | B3LYP-D3 | -11.70 (-17.01)     |                |                      |                |
| Iz:A<br>(T:A) <sup>a</sup> | B3LYP    | -6.90 (-6.57)       | -6.04          | -3.75                | -3.25          |
|                            | ωB97XD   | -9.97 (-10.30)      | -8.49          | -6.03                | -5.34          |
|                            | B3LYP-D3 | -10.78              |                |                      |                |
| Iz:T                       | B3LYP    | -7.15               | -6.23          | -7.30                | -6.50          |
|                            | ωB97XD   | -10.18              | -8.26          | -10.38               | -8.58          |
|                            | B3LYP-D3 | -11.21              |                | -11.55               |                |

<sup>a</sup>[Ref 49,50]

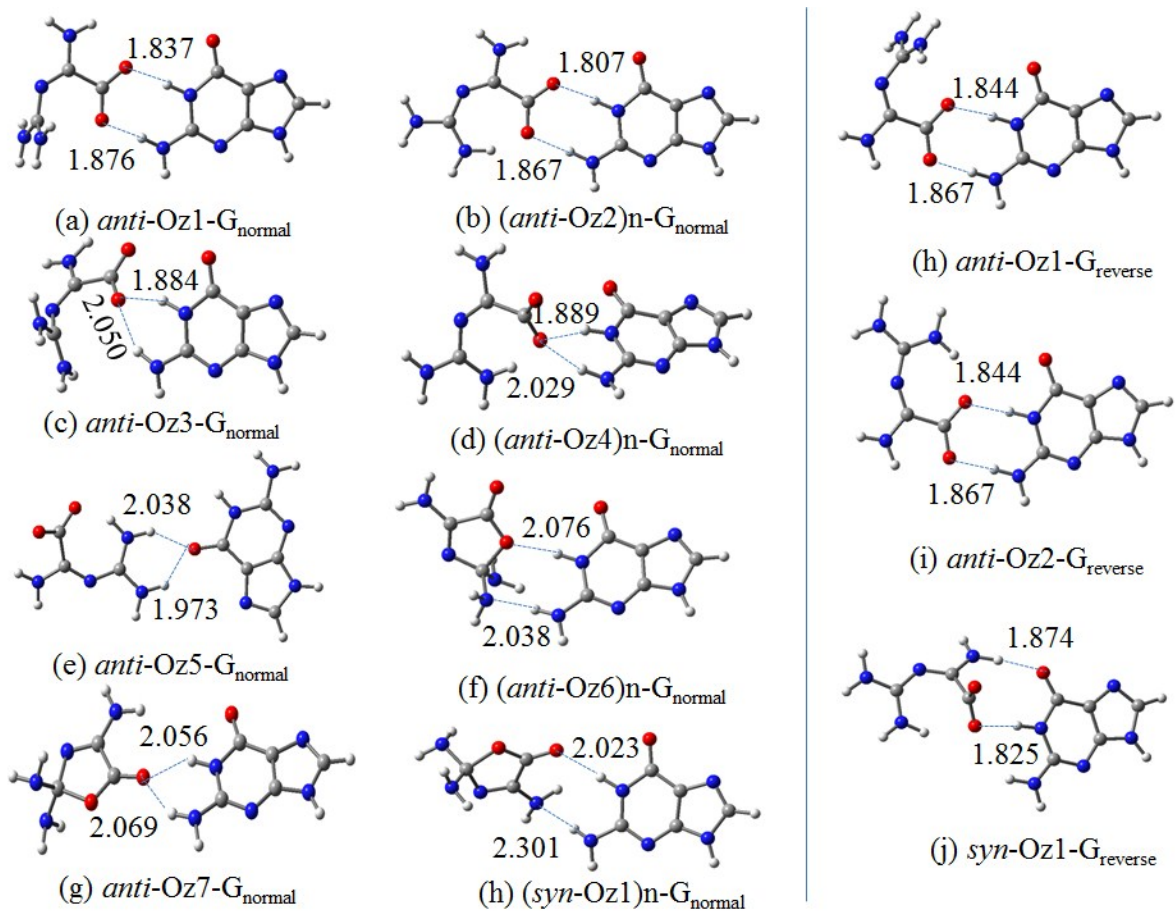

Fig. S8: Optimized structures of Oz:G complexes in the normal (a-f) and reverse (g-i) base pairing orientations obtained at the B3LYP/6-31+G\* level of theory.

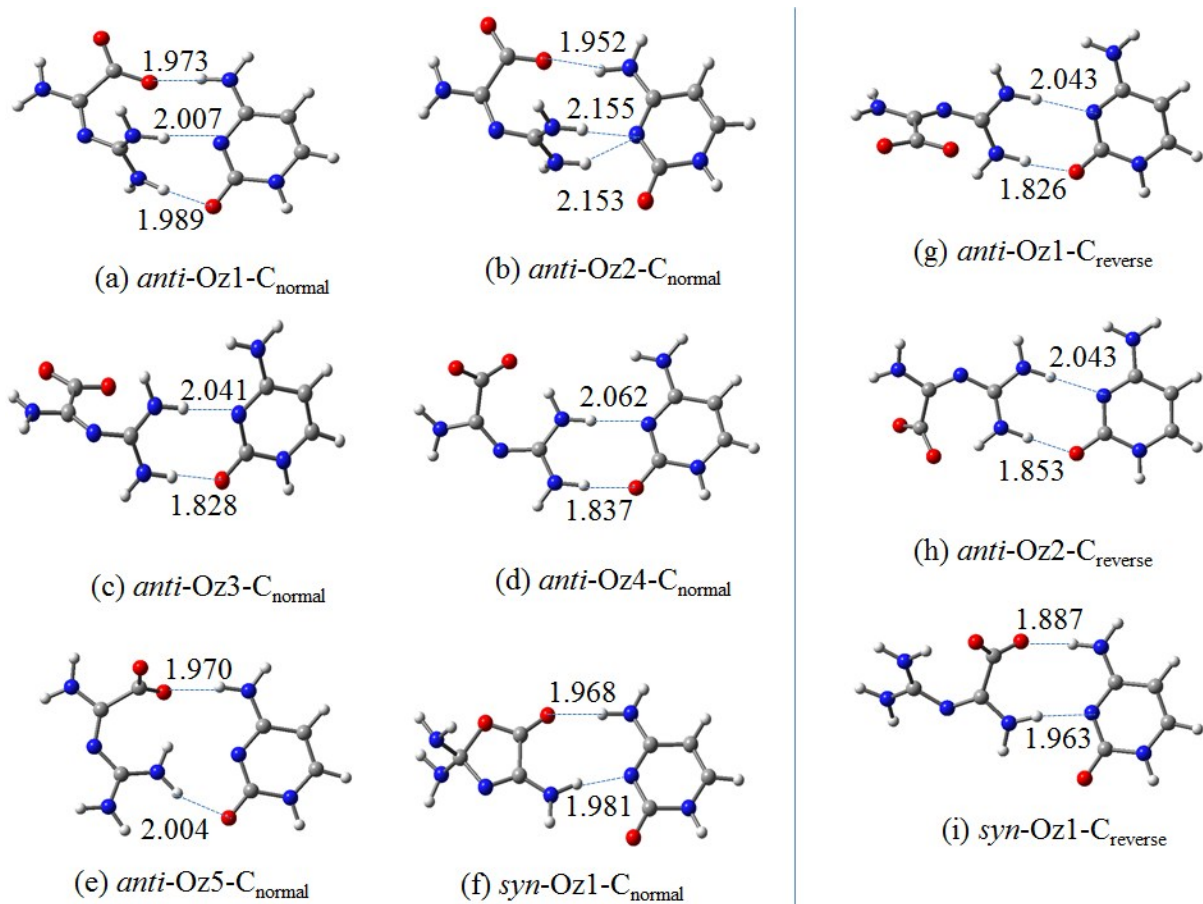

Fig. S9: Optimized structures of Oz:C complexes in the normal (a-e) and reverse (f-h) base pairing orientations obtained at the B3LYP/6-31+G\* level of theory.

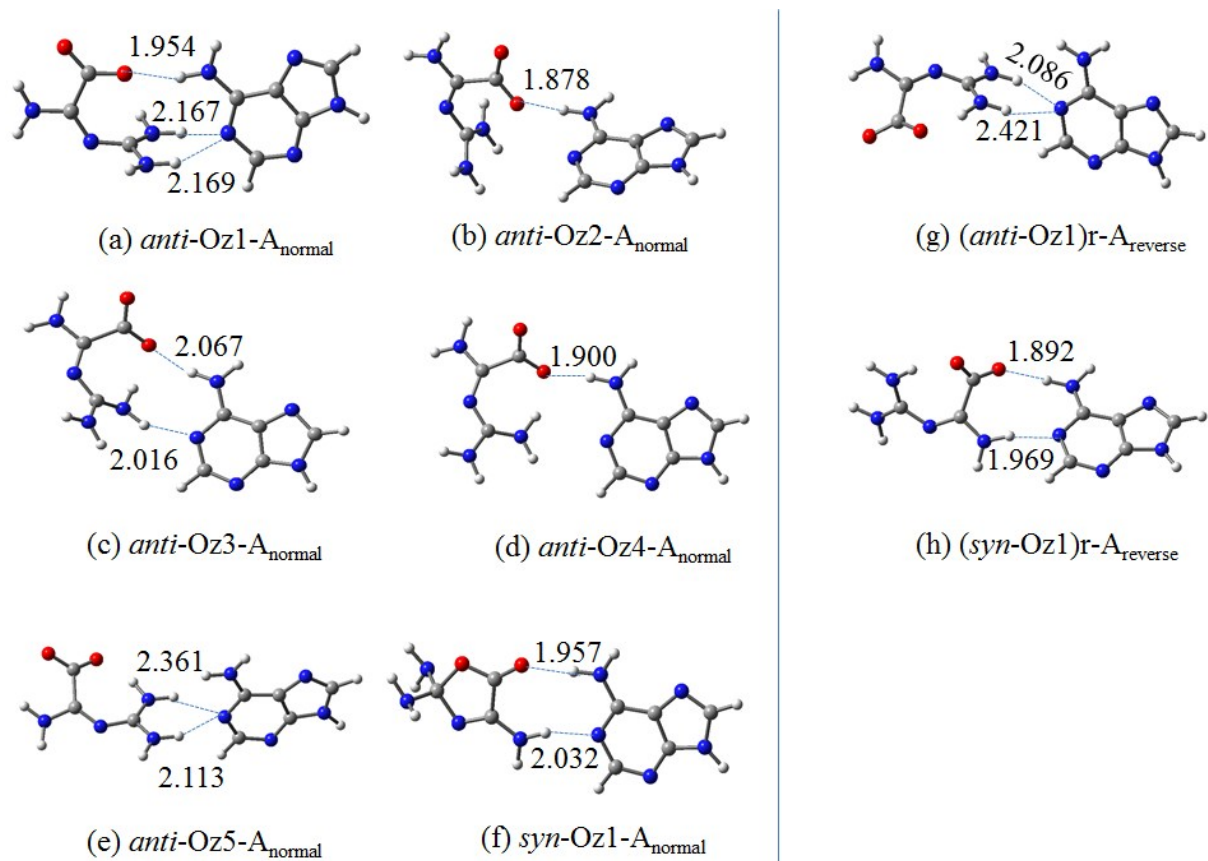

Fig. S10: Optimized structures of Oz:A complexes in the normal (a-f) and reverse (g-h) base pairing orientations obtained at the B3LYP/6-31+G\* level of theory.

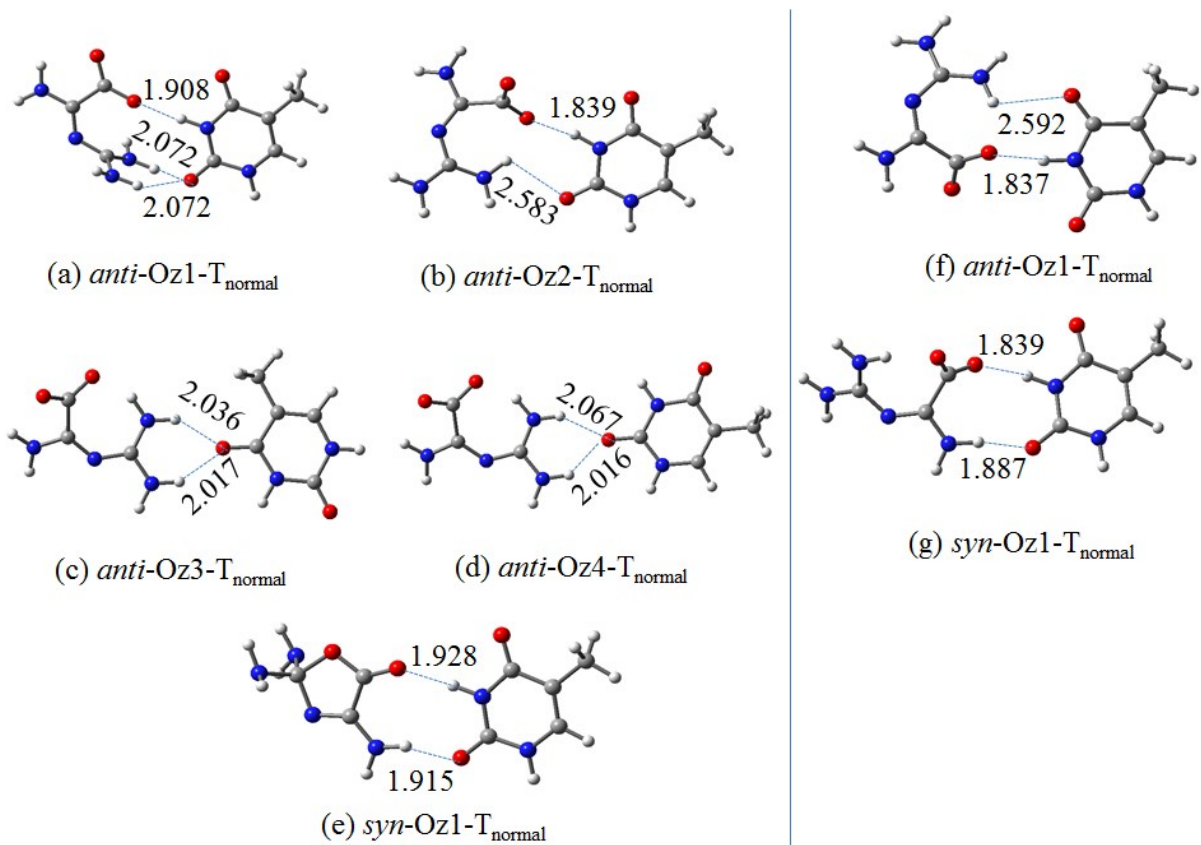

Fig. S11: Optimized structures of Oz:T complexes in the normal (a-c) and reverse (d,e) base pairing orientations obtained at the B3LYP/6-31+G\* level of theory.



Table S3: XYZ-coordinates of anti-Iz:G reverse complex

|   |             |             |             |
|---|-------------|-------------|-------------|
| N | -5.48317700 | 0.50050600  | -0.00191600 |
| C | -4.28356600 | -0.04954900 | -0.00103700 |
| C | -2.99298500 | 0.80393200  | 0.00084400  |
| O | -2.94141500 | 2.03214200  | 0.00164900  |
| N | -1.97895700 | -0.09255900 | 0.00139300  |
| C | -2.58540400 | -1.30989000 | -0.00014000 |
| N | -3.97910300 | -1.33126100 | -0.00156400 |
| N | -1.87947100 | -2.42175800 | -0.00032600 |
| H | -2.35558600 | -3.31369600 | -0.00159800 |
| H | -0.84793700 | -2.36920500 | 0.00055000  |
| H | -6.32810300 | -0.05660000 | -0.00325300 |
| H | -5.56187800 | 1.50973900  | -0.00143300 |
| N | 4.70975900  | 0.63209600  | -0.00167300 |
| C | 5.07293400  | -0.70092700 | -0.00132200 |
| C | 3.33949400  | 0.67895300  | -0.00074200 |
| H | 6.11427400  | -1.00359800 | -0.00194200 |
| N | 4.03720500  | -1.50895200 | -0.00019300 |
| C | 2.93514100  | -0.66422800 | 0.00023700  |
| N | 2.57031000  | 1.79004200  | -0.00074700 |
| C | 1.53477100  | -0.94290400 | 0.00143300  |
| C | 1.27256200  | 1.50694400  | 0.00030400  |
| N | 0.77502200  | 0.22928600  | 0.00149600  |
| H | 5.33621400  | 1.42675000  | -0.00250100 |
| O | 0.96350900  | -2.05496600 | 0.00232300  |
| N | 0.35992500  | 2.50938200  | 0.00053400  |
| H | 0.69336200  | 3.46068100  | -0.00072000 |
| H | -0.64032000 | 2.34090400  | 0.00086800  |
| H | -0.26506300 | 0.10614500  | 0.00174400  |

Table-S4: XYZ-coordinates of *anti*-Oz1:G non-planar normal complex

|   |             |             |             |
|---|-------------|-------------|-------------|
| C | -2.12730300 | 0.54432700  | -0.04646800 |
| C | -4.79338800 | -0.75223300 | 0.05816900  |
| C | -3.52478300 | 1.23567200  | -0.02543800 |
| O | -2.14057300 | -0.70724300 | -0.06044200 |
| N | -4.65403700 | 0.59537100  | 0.00415000  |
| N | -5.04187500 | -1.43121300 | -1.06469600 |
| N | -4.89235300 | -1.36126800 | 1.24315900  |
| H | -5.22895300 | -2.42408600 | -1.06475300 |
| H | -4.94189000 | -0.96207400 | -1.95252800 |
| H | -5.04568600 | -2.35650400 | 1.32549400  |
| H | -4.67994600 | -0.84027900 | 2.08089900  |
| N | -3.48854300 | 2.57099100  | -0.05024800 |
| H | -4.33526400 | 3.12202100  | -0.03928300 |
| H | -2.58352300 | 3.02086300  | -0.07641800 |
| O | -1.13969400 | 1.32187600  | -0.04891600 |
| N | 5.16127800  | -1.21059500 | 0.00857000  |
| C | 5.87313300  | -0.02678300 | 0.04580300  |
| H | 6.95742200  | -0.01786700 | 0.06381800  |
| N | 5.09402600  | 1.03131200  | 0.05574400  |
| C | 3.80399100  | 0.51696100  | 0.02324100  |
| C | 2.53213900  | 1.17599000  | 0.01668300  |
| O | 2.29488800  | 2.39356400  | 0.03977300  |
| N | 1.47232900  | 0.25011800  | -0.02140100 |
| H | 0.51579700  | 0.65269600  | -0.03106400 |
| C | 1.60917400  | -1.12045600 | -0.04874700 |
| N | 0.47153300  | -1.84614700 | -0.08602500 |
| H | -0.46523500 | -1.42286800 | -0.07728600 |
| H | 0.56427500  | -2.85019400 | -0.09665800 |
| N | 2.78709300  | -1.74034000 | -0.04220900 |
| C | 3.82911600  | -0.88169300 | -0.00656800 |
| H | 5.54740600  | -2.14558100 | -0.00488900 |



Table S5: XYZ-coordinates of *anti*-Oz1:G non-planar reverse complex

|   |             |             |             |
|---|-------------|-------------|-------------|
| N | -4.59454900 | 1.90939600  | -0.12561100 |
| C | -3.85964800 | 0.79560300  | -0.05700300 |
| C | -2.32000500 | 1.03227600  | 0.00525900  |
| O | -1.61953500 | -0.00475300 | 0.07543200  |
| N | -3.59352000 | -2.16338400 | 1.19707500  |
| C | -3.75367900 | -1.55940600 | 0.01674900  |
| N | -4.41634600 | -0.37725400 | -0.04309100 |
| N | -3.45953100 | -2.20998500 | -1.11224800 |
| H | -3.00879700 | -3.11434700 | -1.10903200 |
| H | -5.60325600 | 1.87430700  | -0.17005600 |
| H | -4.11105800 | 2.79716200  | -0.13308500 |
| O | -1.94978300 | 2.23144800  | -0.02173100 |
| H | -3.80053900 | -1.65050000 | 2.04114100  |
| H | -3.54915800 | -1.72517300 | -1.99284200 |
| H | -3.15908100 | -3.07145500 | 1.28254300  |
| N | 5.14775500  | 0.41163900  | -0.01485400 |
| C | 5.45207100  | -0.93578300 | -0.04878200 |
| C | 3.77964800  | 0.51746400  | 0.00503200  |
| H | 6.47886000  | -1.28419100 | -0.06961600 |
| N | 4.38037200  | -1.69619800 | -0.05227000 |
| C | 3.31687600  | -0.80297300 | -0.01869000 |
| N | 3.05997000  | 1.66003000  | 0.03833100  |
| C | 1.90247200  | -1.02928900 | -0.00630800 |
| C | 1.74719300  | 1.44094800  | 0.05057000  |
| N | 1.18764000  | 0.18255000  | 0.03102200  |
| H | 5.80811000  | 1.17813100  | -0.00679800 |
| O | 1.29387900  | -2.11045600 | -0.02415600 |
| N | 0.89365600  | 2.48638000  | 0.09058200  |
| H | 1.29565400  | 3.41112200  | 0.07800600  |
| H | -0.12802300 | 2.37836600  | 0.05295800  |
| H | 0.15309800  | 0.10140100  | 0.04691100  |

Table S6: XYZ-coordinates of *anti*-Oz1:C non-planar normal complex

|   |             |             |             |
|---|-------------|-------------|-------------|
| N | -4.68746800 | -0.31006800 | 0.03967200  |
| C | -3.35422300 | -0.27971500 | -0.01879900 |
| C | -2.75491700 | 1.15861400  | -0.24440800 |
| O | -3.56304900 | 2.09950800  | -0.08018300 |
| N | -0.71692000 | -0.90522700 | 1.30079200  |
| C | -1.31785900 | -1.41063300 | 0.20402700  |
| N | -2.66418200 | -1.38725000 | 0.03976700  |
| N | -0.57476600 | -2.11427400 | -0.65007000 |
| H | 0.43715000  | -2.21543000 | -0.51575900 |
| H | -5.18999900 | -1.17439800 | 0.18790200  |
| H | -5.18276700 | 0.56934400  | -0.02637900 |
| O | -1.54637200 | 1.19259400  | -0.57999300 |
| H | -1.27861800 | -0.27503100 | 1.85687300  |
| H | -1.00942500 | -2.47151700 | -1.48760200 |
| H | 0.25278300  | -0.60425800 | 1.13228500  |
| N | 4.00993700  | -0.62416100 | -0.09389600 |
| C | 4.39884700  | 0.68164900  | -0.03793000 |
| C | 2.66617500  | -1.00073700 | -0.05769000 |
| H | 5.46951000  | 0.87021900  | -0.06828500 |
| C | 3.47053200  | 1.67419600  | 0.04064800  |
| N | 1.73532700  | -0.02261000 | 0.05562800  |
| O | 2.35919300  | -2.20901000 | -0.13033900 |
| H | 3.76365600  | 2.71957400  | 0.07087600  |
| C | 2.09082600  | 1.27051700  | 0.06553700  |
| N | 1.09879900  | 2.17497000  | 0.10644900  |
| H | 0.12785800  | 1.87682300  | -0.03255000 |
| H | 1.31258400  | 3.16070700  | 0.07963900  |
| H | 4.69772900  | -1.36377600 | -0.16957800 |
